# Supplementary material for: Exosomes in human semen carry a distinctive repertoire of small non-coding RNAs with potential regulatory functions
Source: PubMed Central journal article supplement — Nucleic Acids Res. 2014 May 16;42(11):7290–304. doi: 10.1093/nar/gku347 (PMC4066774; doi:10.1093/nar/gku347), 2014-05-16
Supplement: supp_gku347_nar-03650-y-2013-File008.pdf [file supp_gku347_nar-03650-y-2013-File008.pdf]

A

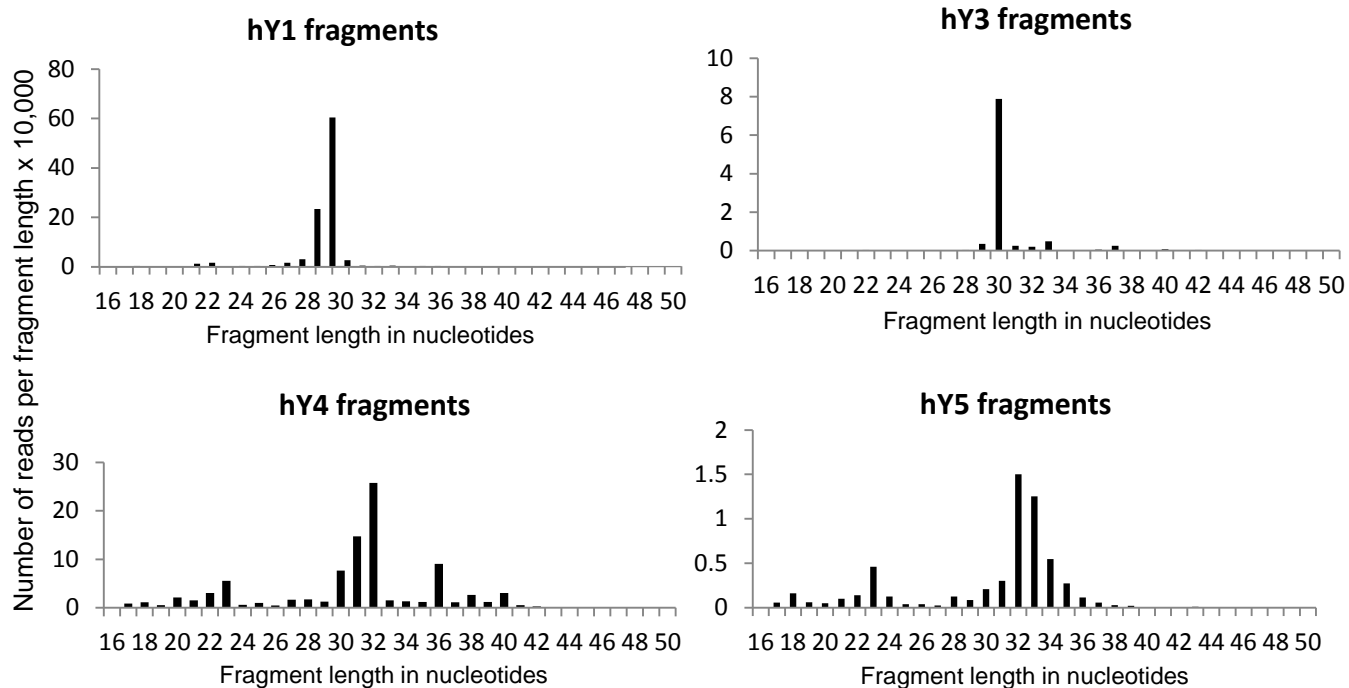

B

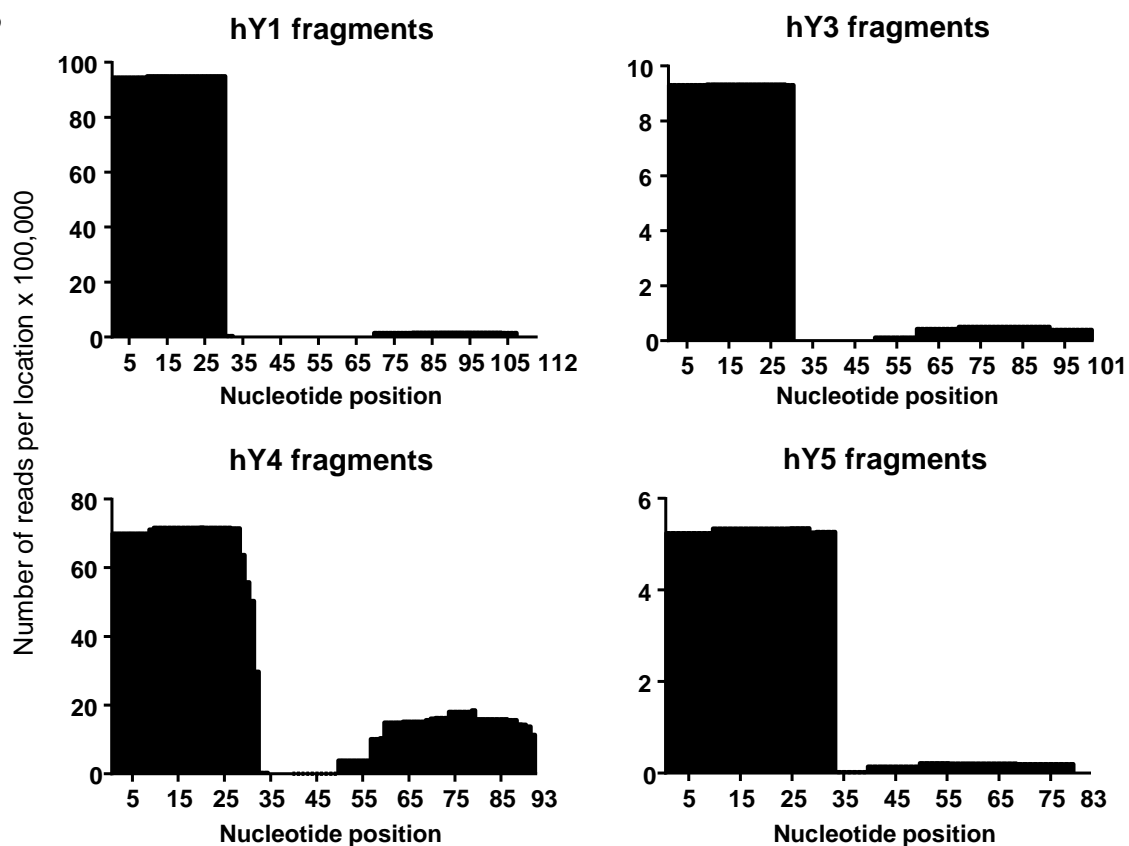

**Supplemental Table 1.** Volumes , SE counts by nanosight analysis, and RNA yield for the six sequenced donors.

|                | <b>Original Semen Volume (mls)</b> | <b>total SE isolated (#)</b> | <b>Count of SE from which RNA was isolated (#)</b> | <b>ng RNA/SE</b> | <b># of SE for 100 ng of RNA</b> |
|----------------|------------------------------------|------------------------------|----------------------------------------------------|------------------|----------------------------------|
| <b>Donor 1</b> | 0.9                                | 1.19E+13                     | 1.19E+13                                           | 2.61E-10         | 3.8E+11                          |
| <b>Donor 2</b> | 1.5                                | 1.04E+13                     | 9.80E+12                                           | 4.16E-11         | 2.4E+12                          |
| <b>Donor 3</b> | 3.9                                | 8.13E+12                     | 7.58E+12                                           | 1.67E-10         | 6.0E+11                          |
| <b>Donor 4</b> | 1.6                                | 1.40E+13                     | 1.40E+13                                           | 2.71E-11         | 3.7E+12                          |
| <b>Donor 5</b> | 4                                  | 6.46E+12                     | 3.03E+12                                           | 2.43E-10         | 4.1E+11                          |
| <b>Donor 6</b> | 2                                  | 8.80E+13                     | 3.41E+13                                           | 1.72E-11         | 5.8E+12                          |

**Supplemental Table 2.** Pairwise Spearman's correlation coefficients of RNA biotypes in the larger size-fractionated libraries (median 0.96)

| Donor | 2    | 3    | 4    | 5    | 6    |
|-------|------|------|------|------|------|
| 1     | 0.96 | 0.89 | 0.89 | 0.96 | 0.89 |
| 2     |      | 0.96 | 0.96 | 1.00 | 0.96 |
| 3     |      |      | 1.00 | 0.96 | 1.00 |
| 4     |      |      |      | 0.96 | 1.00 |
| 5     |      |      |      |      | 0.96 |

**Supplemental Table 3.** Pairwise Spearman's correlation coefficients of RNA biotypes in the smaller size-fractionated libraries (median 0.46)

| Donor | 2    | 3    | 4    | 5    | 6    |
|-------|------|------|------|------|------|
| 1     | 0.71 | 0.46 | 0.68 | 0.46 | 0.46 |
| 2     |      | 0.43 | 0.75 | 0.61 | 0.18 |
| 3     |      |      | 0.89 | 0.25 | 0.61 |
| 4     |      |      |      | 0.43 | 0.43 |
| 5     |      |      |      |      | 0.57 |

**Supplemental Table 4.** Pairwise Spearman's correlation coefficients of read numbers for 175 common miRNAs in SE (median 0.86)

| Donor | 2    | 3    | 4    | 5    | 6    |
|-------|------|------|------|------|------|
| 1     | 0.82 | 0.86 | 0.88 | 0.83 | 0.83 |
| 2     |      | 0.80 | 0.82 | 0.78 | 0.81 |
| 3     |      |      | 0.88 | 0.89 | 0.92 |
| 4     |      |      |      | 0.88 | 0.91 |
| 5     |      |      |      |      | 0.88 |

**Supplemental Table 5.** Pairwise Spearman's correlation coefficients of tRNA in larger libraries by isoacceptor type (median 0.95)

| Donor | 2    | 3    | 4    | 5    | 6    |
|-------|------|------|------|------|------|
| 1     | 0.95 | 0.95 | 0.88 | 0.98 | 0.95 |
| 2     |      | 0.93 | 0.86 | 0.98 | 0.93 |
| 3     |      |      | 0.93 | 0.98 | 1.00 |
| 4     |      |      |      | 0.90 | 0.93 |
| 5     |      |      |      |      | 0.98 |

**Supplemental Table 6.** Pairwise Spearman's correlation coefficients of tRNA in smaller libraries by isoacceptor type (median 0.93)

| Donor | 2    | 3    | 4    | 5    | 6    |
|-------|------|------|------|------|------|
| 1     | 0.48 | 0.93 | 0.93 | 0.90 | 0.98 |
| 2     |      | 0.62 | 0.62 | 0.67 | 0.57 |
| 3     |      |      | 1.00 | 0.98 | 0.98 |
| 4     |      |      |      | 0.98 | 0.98 |
| 5     |      |      |      |      | 0.95 |

**Supplemental Table 7.** Pairwise Spearman's correlation coefficients of read numbers for larger size-fractionated protein-coding mRNA in SE (median 0.18)

| Donor | 2    | 3    | 4    | 5    | 6    |
|-------|------|------|------|------|------|
| 1     | 0.11 | 0.22 | 0.21 | 0.18 | 0.20 |
| 2     |      | 0.12 | 0.11 | 0.12 | 0.13 |
| 3     |      |      | 0.23 | 0.17 | 0.21 |
| 4     |      |      |      | 0.18 | 0.21 |
| 5     |      |      |      |      | 0.16 |

**Supplemental Table 8.** Pairwise Spearman's correlation coefficients of read numbers for smaller size-fractionated protein-coding mRNA in SE (median 0.20)

| Donor | 2    | 3    | 4    | 5    | 6    |
|-------|------|------|------|------|------|
| 1     | 0.19 | 0.21 | 0.26 | 0.19 | 0.18 |
| 2     |      | 0.18 | 0.21 | 0.19 | 0.16 |
| 3     |      |      | 0.25 | 0.20 | 0.20 |
| 4     |      |      |      | 0.23 | 0.22 |
| 5     |      |      |      |      | 0.17 |
